# Supplementary material for: Insertional mutagenesis in the zoonotic pathogen Chlamydia caviae
Source: PubMed Central journal article supplement (PMC6837515; doi:10.1371/journal.pone.0224324), 2019-11-07
Supplement: pone.0224324.s002.pdf [file pone.0224324.s002.pdf]

1 tttagcttcc ttagctcctg aaaatctcga taactcaaaa aatacgcccg gtagtgatct  
61 tatttcatta tgggtgaaagt tggaaacctct tacgtgccga tcaacgtctc attttcgcca  
121 aaagttggcc cagggcttcc cggatcaaac agggacacca ggatttattt attctgcgaa  
181 gtgactttcc gtcacaggtg tttattcggc gcaaagtgcg tcgggtgatg ctgccaactt  
241 actgatttag tgtatgatgg tgtttttgag gtgctccagt ggcttctggt tctatcagct  
301 gtccctcctg ttcagctact gacgggggtg tgcgtaacgg caaaagcacc gccggacatc  
361 agcgctagcg gtagtgatac tggcttacta tgttggcact gatgaggggtg tcaagtgaagt  
421 gcttcatgtg gcaggagaaa aaaggctgca ccgggtgcgtc agcagaatat gtgatacagg  
481 atatattccg ctccctcgtc cactgactcg ctacgctcgg tcgttcgact gccggcagcg  
541 gaaatggctt acgaacgggg cggagatctt ctggaagatg ccaggaagat acttaacagg  
601 gaagtggagag ggccgcggca aagccgtttt tccataggct ccgccccctc gacaagcatc  
661 acgaaatctg acgctcaaat cagtgtggc gaaaccgcag aggactataa agataccagg  
721 cgtttccccc tggcggctcc ctctgtgcgt ctctgttcc tgccttctcg tttaccgggtg  
781 tcattccgct gttatggcgg cgtttgcctc attccacgcc tgacactcag ttccgggtag  
841 gcagttcgct ccaagctgga ctgtatgcac gaaccccccg ttcagtccga ccgctgcgcc  
901 ttatccggta actatcgtct tgagccaac ccggaaagac atgcaaaagc accactggca  
961 gcagccactg gtaattgatt tagaggagt agtcttgaag tcatgcgccg gtttaaggcta  
1021 aactgaaagg acaagttttg gtgactgcgc tcctccaagc cagttacctc gttcaaaaga  
1081 gttggtagct cagagaacct tcgaaaaacc gccctgcaag gcggtttttt cgtttccaga  
1141 gcaagagatt acgcgcagac caaaacgatc tcaagaagat catcttatta atcagataaa  
1201 atatttctag ctagatttca gtgcaattta tctcttcaaa tgtagcacct gaagtcagcc  
1261 ccatacgata taagtgtgaa ttctcatggt tgacagctta tcatcgataa gctcaaggag  
1321 atggcgccca acagtccccc ggccacgggg cctgccacca taccacgccc gaaacaagcg  
1381 ctcatgagcc cgaagtggcg agcccgatct tccccatcgg tgatgtcggc gatataggcg  
1441 ccagcaaccg cacctgtggc gccggtgatg ccggccacga tgcgtccggc gtatagggatc  
1501 gagatctcga tcccgcgaaa ttaatacgac tcaactatagg ggaattgtga gcggataaca  
1561 attcccctct agaggtaccg gatcctccaa attattcctt acatgaattt tttgtctgag  
1621 cgactttctc ccattgaaaa agatttctt aaacaaaacg tgctttactt cttgcagaaa  
1681 aatcggtaga cttgccgttt cgtctaggca gactcgtccg cgtctttttt caaaactccc  
1741 tttttagtaa gtttttgaag gcgttctca gattttccc agttggagga gactggcccg  
1801 cactacaagc tcatatcaag gtaaggaaag atttccaagc ttataattat ccttannnnn  
1861 cnnnnnngtg cgcccagata ggggtgtaag tcaagttagt taaggtacta ctctgtaaga  
1921 taacacagaa aacagccaac ctaaccgaaa agcgaagct gatacgggaa cagagcacgg  
1981 ttggaagcg atgagttacc taaagacaat cgggtacgac tgagtcgcaa tggtaacag  
2041 atataaggta taagtgtgt ttactgaacg caagtttcta atttcgnttn nnnnncgata  
2101 gaggaaagtg tctgaaacct ctagtacaaa gaaaggtaag ttannnnnnn ngacttatct  
2161 gttatcacca catttgtaca atctgtagga gaacctatgg gaacgaaacg aaagcgatgc  
2221 cgagaatctg aatttaccac gacttaacac taactgggga taccctaaac aagaatgcct  
2281 aatagaaagg aggaaaaagg ctatagcact agagcttga aatcttgcga gggtaacggg  
2341 tactcgtagt agtctgagaa gggtaacgcc ctttacctgg caaaggggta cagttattgt  
2401 gtactaaaat taaaaatga ttagggagga aaacctcaaa atgaaaccaa caatggcaat  
2461 tttagaaaaga atcagtaaaa attcacaaga aaatatagac gaagttttta caagacttta  
2521 tcgttatctt ttacgtccag atatttatta cgtggcgacg cgtaggttaa tgtcatgata  
2581 ataaggttt cttagacgtc aggtggcact tttcgggaa atgtgcgcyg aacctattt  
2641 tgttttttt tctaaataca ttcaaatatg tatccgctca tgagacaata accctgataa  
2701 atgcttcaat aatattgaaa aaggaagagt gcatgcatgg agaaaaaaat cactggatat  
2761 accaccgtg atatatccca atggcatcgt aaagaacatt ttgaggcatt tcaagcagtt  
2821 gctcaatgta cctataacca gaccgtcag ctggatatta cggccttttt aaagaccgta  
2881 aagaaaaata agcacaagtt ttatccggcc tttattcaca ttcttgcccg cctgatgaat  
2941 gctcatccgg aattccgtat ggcaatgaaa gacgggtgagc tgggtgatatg ggatagtgtt  
3001 cacccttgtt acaccgtttt ccatgagcaa actgaaacgt tttcatcgct ctggagtga  
3061 taccacgacg atttccggca gtttctacac atatatcgc aagatgtggc gtgttacggg  
3121 gaaaacctgg cctatttccc taaagggttt attgagaata tgtttttcgt ctacgccaat  
3181 ccctgggtga gtttcaccag ttttgattta aacgtggcca atatggaaa cttctcggc  
3241 cccgttttca ccatgggcaa atattatacg caaggcgaca aggtgctgat gccgctggcg  
3301 attcaggttc atcatgccgt ctgtgatggc ttccatgtcg gcagaatgct taatgaatta  
3361 caacagtact gcgatgagt gcagggcggg gcgcatatg tgtcagacca agttactca  
3421 tatatacttt agattgattt aaaactcat ttttaattta aaaggatcta ggtgaagatc  
3481 ctttttgata atctcatgac caaaatccct taacgtgagt tttcgttcca cacgcgttgg  
3541 gaaatggcaa tgatagcgaa acaacgtaaa actcttgttg tatgcttcca ttgtcatcgt  
3601 cacgtgatc ataaacacaa gtgaatgctg acagtgaatt tttacgaacg aacaataaca  
3661 gagccgtata ctccgagagg ggtacgtacg gttcccgaag aggggtggtg aaaccagtca  
3721 cagtaatgtg aacaaggcgg tacctcccta cttcaccata tcattttctg cagcccccta  
3781 gaaataattt tgtttaactt taagaaggag atatacatat atggctagat cgtccattcc  
3841 gacagcatcg ccagtcacta tggcgtgctg ctacgcctat atgcgttgat gcaatttcta  
3901 tgcactcgta gtagtctgag aagggtaacg ccctttacat ggcaaaagggg tacagttatt  
3961 gtgtactaaa attaaaaatt gattagggag gaaaacctca aatgaaacc aacaatggca  
4021 attttagaaa gaatcagtaa aaattcacia gaaaatatag acgaagtttt tacaagactt

```

4081 tatcgttatc ttttacgtcc agatatttat tacgtggcgt atcaaaattt atattccaat
4141 aaaggagctt ccacaaaagg aatattagat gatacagcgg atggctttag tgaagaaaaa
4201 ataaaaaaga ttattcaatc tttaaaagac ggaacttact atcctcaacc tgtacgaaga
4261 atgtatattg caaaaaagaa ttctaaaaag atgagacctt taggaattcc aactttcaca
4321 gataaattga tccaagaagc tgtgagaata attcttgaat ctatctatga accggtattc
4381 gaagatgtgt ctacaggttt tagacctcaa cgaagctgtc acacagcttt gaaaacaatc
4441 aaaagagagt ttggcggcgc aagatggttt gtggagggag atataaaaagg ctgcttcgat
4501 aatatagacc acgttacctt cattggactc atcaatctta aaatcaaga tatgaaaatg
4561 agccaattga tttataaatt tctaaaagca ggttatctgg aaaactggca gtatcacaaa
4621 acttacagcg gaacacctca aggtggaatt ctatctctc ttttggccaa catctatctt
4681 catgaattgg ataagtttgt tttacaactc aaaatgaagt ttgaccgaga agtccagaa
4741 agaataacac ctgaatatcg ggagctccac aatgagataa aaagaatttc tcaccgtctc
4801 aagaagttgg aggggtgaaga aaaagctaaa gttcttttag aatatcaaga aaaacgtaaa
4861 agattacca cactcccctg tacctcacag acaataaag tattgaata cgtccggtat
4921 gcggacgact tcattatctc tgttaaagga agcaaaagag actgtcaatg gataaaagaa
4981 caattaaaac tttttattca taacaagcta aaaatggaat tgagtgaaga aaaaactctc
5041 atcacacata gcagtcaacc cgctcgtttt ctgggatatg atatacgagt aaggagatct
5101 ggaacgataa aacgatctgg taaagtcaaa aagagaacac tcaatgggag tgtagaactc
5161 cttattctctc ttcaagacaa aattcgtcaa tttatttttg acaagaaaat agctatccaa
5221 aagaaagata gctcatggtt tccagttcac aggaaatatac ttattcgttc aacagactta
5281 gaaatcatca caatttataa ttctgaactc cgcgggattt gtaattacta cggcttagca
5341 agtaatttta accagctcaa ttattttgct tatcttatgg aatacagctg tctaaaaacg
5401 atagctcca aacataaggg aacactttca aaaaccattt ccatgtttaa agatggaagt
5461 ggttcgtggg ggatcccgtg tgagataaag caaggtaaag agcgcggtta tttgcaaat
5521 tttagtgaat gtaaatcccc ttatcaattt acggatgaga taagtcaagc tcctgtattg
5581 tatggctatg cccggaatac tcttgaaaac aggttaaaag ctaaagtgtg tgaattatgt
5641 gggacgtctg atgaaaatac ttctatgaa attcaccatg tcaataaggt caaaaaatctt
5701 aaaggcaaag aaaaatggga aatggcaatg atagcgaac aacgtaaac tcttgttgta
5761 tgctttcatt gtcacgtca cgtgatcat aaacacaagt gaatgtcgag caccggttct
5821 cggagcactg tccgaccgct ttggccgccc cccagtcctg ctcgcttctc tacttggagc
5881 cactatcgac taccgatca tggcgaccac acccgtcctg tggatcgcca agctcgccga
5941 tggtagtgtg gggctctccc atgcbagagt agggaaactgc caggcatcaa ataaaaagaa
6001 aggctcagtc gaaagactgg gcctttcgtt ttatctgttg tttgtcggtg aacgctctcc
6061 tgagtaggac aaatccgccc ggagcggatt tgaacgttgc gaagcaacgg cccggagggt
6121 ggcgggaggc acgcccgcca taaactgcca ggcatcaaat taagcagaag gccatcctga
6181 cggatggcct ttttgcgttt ctacaaactc ttctgtcgt catatctaca agccatcccc
6241 ccacagatac ggtaaaactag cctcgttttt gcatcaggaa agcagaacgc catgagcggc
6301 ctcatctctt attctgagtt acaacagctc gcaccgctgt ccggtagctc cttccggtgg
6361 gcgcggggca tgactatcgt cgccgcaact atgactgtct tctttatcat gcaactcgta
6421 ggacaggtgc cggcagcgcc caacagctcc cggccacgg ggctgcccac catacccacg
6481 ccgaaacaag cgccctgcac cattatgttc cggatctgca tgcaggatg ctgctggcta
6541 ccctgtggaa cacctacatc tgtattaacg aagcgtaac cgttttatc aggctctggg
6601 aggcagaata aatgatcata tcgtcaatta ttacctccac ggggagagcc tgagcaaaact
6661 ggcctcaggc atttgagaag cacacggtca cactgcttcc ggtagtcaat aaaccggtaa
6721 accagcaata gacataagcg gctatttaac gaccctgccc tgaaccgacg accgggtcga
6781 atttgctttc gaatttctgc cattcatccg cttattatca cttattcagg cgtagcacca
6841 ggcgtttaag ggcaccaata actgccttaa aaaattagg gcc

```

**S2 Fig: Sequence of vector pDFTT3-CAT.** The sequences IBS, EBS2, and EBS1d, which are modified during the process of retargeting the vector for disruption of the gene of interest, are indicated as strings of “n”. The exact sequences at these positions in the vector used for disrupting *C. caviae incA* were *ggactcgtgttg* (IBS), *attagtctct* (EBS2), and *gacaacac* (EBS1d). In the vector used for disrupting *C. caviae sinC* these sequences were *ctatccctagag* (IBS), *gttgatagt* (EBS2), and *agctctag* (EBS1d).
