# Supplementary material for: Insertional mutagenesis in the zoonotic pathogen Chlamydia caviae
Source: PubMed Central journal article supplement (PMC6837515; doi:10.1371/journal.pone.0224324), 2019-11-07
Supplement: pone.0224324.s009.pdf [file pone.0224324.s009.pdf]

**S4 Table: Input calculation for the quantification of infectious progeny.** The table depicts a part of the data underlying the graphs displayed in Fig 3A-D (see also S5 and S6 Tables). Confluent monolayers of Vero cells in 96-well plates were infected with serial dilutions of the inoculum that was used to infect the output collection plate (undiluted, 1:5, 1:25, 1:125; 20  $\mu$ l per well). Cells were fixed at 28 hpi and inclusions were stained and detected using the ArrayScan automated imaging platform. Inclusion counts were used to calculate the number of IFUs present in the inoculum that had been used to infect the output collection plate.

| Cells | Exp | Strain           | Inclusions/field <sup>a</sup>                    |        |        | Inclusions/well <sup>b</sup>     |        |        | IFUs in 100 $\mu$ l inoculum <sup>c</sup> |                      |                     |                           |
|-------|-----|------------------|--------------------------------------------------|--------|--------|----------------------------------|--------|--------|-------------------------------------------|----------------------|---------------------|---------------------------|
|       |     |                  | (corrected for dilution and for false positives) |        |        | (inclusions/field x fields/well) |        |        | (inclusions/well x 5)                     |                      |                     |                           |
|       |     |                  | well 1                                           | well 2 | well 3 | well 1                           | well 2 | well 3 | well 1                                    | well 2               | well 3              | mean                      |
| HeLa  | 1   | Wild-type        | 62.7                                             | 54.4   | 53.6   | 4871.4                           | 4231.7 | 4163.3 | 2.4x10 <sup>4</sup>                       | 2.1 x10 <sup>4</sup> | 2.1x10 <sup>4</sup> | <b>2.2x10<sup>4</sup></b> |
| HeLa  | 1   | <i>incA::GII</i> | 72.8                                             | 70.2   | 72.1   | 5657.3                           | 5458.3 | 5605.2 | 2.8x10 <sup>4</sup>                       | 2.7 x10 <sup>4</sup> | 2.8x10 <sup>4</sup> | <b>2.8x10<sup>4</sup></b> |
| HeLa  | 1   | <i>sinC::GII</i> | 64.1                                             | 70.2   | 66.3   | 4983.3                           | 5458.3 | 5155.9 | 2.5x10 <sup>4</sup>                       | 2.7 x10 <sup>4</sup> | 2.6x10 <sup>4</sup> | <b>2.6x10<sup>4</sup></b> |
| HeLa  | 2   | Wild-type        | 47.9                                             | 42.6   | 38.3   | 3722.5                           | 3308.2 | 2979.4 | 1.9x10 <sup>4</sup>                       | 1.7 x10 <sup>4</sup> | 1.5x10 <sup>4</sup> | <b>1.7x10<sup>4</sup></b> |
| HeLa  | 2   | <i>incA::GII</i> | 53.7                                             | 52.9   | 54.1   | 4171.8                           | 4111.2 | 4206.0 | 2.1x10 <sup>4</sup>                       | 2.1 x10 <sup>4</sup> | 2.1x10 <sup>4</sup> | <b>2.1x10<sup>4</sup></b> |
| HeLa  | 2   | <i>sinC::GII</i> | 54.6                                             | 55.2   | 46.9   | 4241.0                           | 4292.3 | 3644.8 | 2.1x10 <sup>4</sup>                       | 2.1 x10 <sup>4</sup> | 1.8x10 <sup>4</sup> | <b>2.0x10<sup>4</sup></b> |
| HeLa  | 3   | Wild-type        | 44.7                                             | 34.6   | 38.4   | 3472.0                           | 2686.1 | 2988.5 | 1.7x10 <sup>4</sup>                       | 1.3 x10 <sup>4</sup> | 1.5x10 <sup>4</sup> | <b>1.5x10<sup>4</sup></b> |
| HeLa  | 3   | <i>incA::GII</i> | 65.7                                             | 67.6   | 61.6   | 5104.3                           | 5251.2 | 4784.9 | 2.6x10 <sup>4</sup>                       | 2.6 x10 <sup>4</sup> | 2.4x10 <sup>4</sup> | <b>2.5x10<sup>4</sup></b> |
| HeLa  | 3   | <i>sinC::GII</i> | 63.1                                             | 58.2   | 44.3   | 4905.3                           | 4526.0 | 3446.3 | 2.5x10 <sup>4</sup>                       | 2.3 x10 <sup>4</sup> | 1.7x10 <sup>4</sup> | <b>2.1x10<sup>4</sup></b> |
| Vero  | 1   | Wild-type        | 106.0                                            | 101.5  | 88.6   | 8239.5                           | 7889.7 | 6883.9 | 4.1x10 <sup>4</sup>                       | 3.9 x10 <sup>4</sup> | 3.4x10 <sup>4</sup> | <b>3.8x10<sup>4</sup></b> |
| Vero  | 1   | <i>incA::GII</i> | 60.9                                             | 62.1   | 87.6   | 4733.0                           | 4827.9 | 6806.1 | 2.4x10 <sup>4</sup>                       | 2.4 x10 <sup>4</sup> | 3.4x10 <sup>4</sup> | <b>2.7x10<sup>4</sup></b> |
| Vero  | 1   | <i>sinC::GII</i> | 99.0                                             | 94.9   | 89.1   | 7695.4                           | 7375.9 | 6926.6 | 3.8x10 <sup>4</sup>                       | 3.7 x10 <sup>4</sup> | 3.5x10 <sup>4</sup> | <b>3.7x10<sup>4</sup></b> |
| Vero  | 2   | Wild-type        | 110.6                                            | 99.0   | 99.4   | 8593.4                           | 7695.6 | 7729.8 | 4.3x10 <sup>4</sup>                       | 3.8 x10 <sup>4</sup> | 3.9x10 <sup>4</sup> | <b>4.0x10<sup>4</sup></b> |
| Vero  | 2   | <i>incA::GII</i> | 78.8                                             | 74.6   | 97.6   | 6123.1                           | 5795.1 | 7582.9 | 3.1x10 <sup>4</sup>                       | 2.9 x10 <sup>4</sup> | 3.8x10 <sup>4</sup> | <b>3.3x10<sup>4</sup></b> |
| Vero  | 2   | <i>sinC::GII</i> | 116.8                                            | 104.4  | 96.7   | 9076.9                           | 8118.5 | 7513.7 | 4.5x10 <sup>4</sup>                       | 4.1 x10 <sup>4</sup> | 3.8x10 <sup>4</sup> | <b>4.1x10<sup>4</sup></b> |
| Vero  | 3   | Wild-type        | 110.3                                            | 100.3  | 100.1  | 8576.3                           | 7799.0 | 7781.9 | 4.3x10 <sup>4</sup>                       | 3.9 x10 <sup>4</sup> | 3.9x10 <sup>4</sup> | <b>4.0x10<sup>4</sup></b> |
| Vero  | 3   | <i>incA::GII</i> | 78.3                                             | 74.0   | 97.2   | 6088.9                           | 5752.4 | 7557.3 | 3.0x10 <sup>4</sup>                       | 2.9 x10 <sup>4</sup> | 3.8x10 <sup>4</sup> | <b>3.2x10<sup>4</sup></b> |
| Vero  | 3   | <i>sinC::GII</i> | 116.0                                            | 104.6  | 97.3   | 9017.1                           | 8127.0 | 7565.8 | 4.5x10 <sup>4</sup>                       | 4.1 x10 <sup>4</sup> | 3.8x10 <sup>4</sup> | <b>4.1x10<sup>4</sup></b> |

<sup>a</sup> The number of inclusions/field detected in the optimal dilution was multiplied with the dilution factor. Moreover, the value was corrected for false positives by subtraction of the number of false inclusions detected on average in uninfected wells (< 2 in each experiment).

<sup>b</sup> The number of inclusions/well was calculated by multiplying the number of inclusions/field with the number of fields/well (~77.7).

<sup>c</sup> To calculate the number of IFUs that had been used for infection of the output collection plate, the numbers of inclusions/well had to be multiplied by 5, because a 5 times larger inoculum (100  $\mu$ l/well) had been used for the infection of the output collection plate.
