# Supplementary material for: Insertional mutagenesis in the zoonotic pathogen Chlamydia caviae
Source: PubMed Central journal article supplement (PMC6837515; doi:10.1371/journal.pone.0224324), 2019-11-07
Supplement: pone.0224324.s013.pdf [file pone.0224324.s013.pdf]

**S8 Table: Monitoring of chicken embryo death and survival.** The table depicts the raw data underlying the graph displayed in Fig 3F. Displayed are observed time points of chicken embryo death (in hours post injection; S.U.E: survived until endpoint; I.F: injection failure, egg excluded at the beginning of the experiment) and the calculated proportions of surviving embryos over the course of time.

| <b>Recorded chicken embryo deaths [hours post injection]</b> |                  |                         |                         |             |
|--------------------------------------------------------------|------------------|-------------------------|-------------------------|-------------|
| <b>Exp1</b>                                                  | <b>Wild-type</b> | <b><i>sinC::GII</i></b> | <b><i>incA::GII</i></b> | <b>Mock</b> |
| Egg 1                                                        | 113              | 125                     | 121                     | S.U.E       |
| Egg 2                                                        | 119              | 131                     | 125                     | S.U.E       |
| Egg 3                                                        | 125              | 133                     | 129                     | S.U.E       |
| Egg 4                                                        | 127              | 137                     | 129                     | S.U.E       |
| Egg 5                                                        | I.F              | 137                     | I.F                     | S.U.E       |
| <b>Exp2</b>                                                  | <b>Wild-type</b> | <b><i>sinC::GII</i></b> | <b><i>incA::GII</i></b> | <b>Mock</b> |
| Egg 1                                                        | 117              | 125                     | 119                     | S.U.E       |
| Egg 2                                                        | 117              | 125                     | 119                     | S.U.E       |
| Egg 3                                                        | 123              | 132                     | 119                     | S.U.E       |
| Egg 4                                                        | 123              | 135                     | 123                     | S.U.E       |
| Egg 5                                                        | 129              | 137                     | 123                     | S.U.E       |
| Egg 6                                                        | 132              | 139                     | 125                     | S.U.E       |
| Egg 7                                                        | 139              | 169                     | I.F                     | S.U.E       |
| <b>Exp3</b>                                                  | <b>Wild-type</b> | <b><i>sinC::GII</i></b> | <b><i>incA::GII</i></b> | <b>Mock</b> |
| Egg 1                                                        | 70               | 119                     | 115                     | S.U.E       |
| Egg 2                                                        | 113              | 127                     | 117                     | S.U.E       |
| Egg 3                                                        | 117              | 130                     | 117                     | S.U.E       |
| Egg 4                                                        | 121              | 133                     | 119                     | S.U.E       |
| Egg 5                                                        | 130              | 133                     | 121                     | S.U.E       |
| Egg 6                                                        | 130              | 137                     | 130                     | S.U.E       |
| Egg 7                                                        | 143              | 137                     | 133                     | S.U.E       |
| <b>Total n</b>                                               | <b>18</b>        | <b>19</b>               | <b>17</b>               | <b>19</b>   |
| <b>Survival [hours post injection]</b>                       |                  |                         |                         |             |
| <b>Time [hpi]</b>                                            | <b>Wild-type</b> | <b><i>sinC::GII</i></b> | <b><i>incA::GII</i></b> | <b>Mock</b> |
| 0                                                            | 100.0            | 100.0                   | 100.0                   | 100.0       |
| 70                                                           | 94.4             | 100.0                   | 100.0                   | 100.0       |
| 113                                                          | 83.3             | 100.0                   | 100.0                   | 100.0       |
| 115                                                          | 83.3             | 100.0                   | 94.1                    | 100.0       |
| 117                                                          | 66.7             | 100.0                   | 82.4                    | 100.0       |
| 119                                                          | 61.1             | 94.7                    | 58.8                    | 100.0       |
| 121                                                          | 55.6             | 94.7                    | 47.1                    | 100.0       |
| 123                                                          | 44.4             | 94.7                    | 35.3                    | 100.0       |
| 125                                                          | 38.9             | 78.9                    | 23.5                    | 100.0       |
| 127                                                          | 33.3             | 73.7                    | 23.5                    | 100.0       |
| 129                                                          | 27.8             | 73.7                    | 11.8                    | 100.0       |
| 130                                                          | 16.7             | 68.4                    | 5.9                     | 100.0       |
| 131                                                          | 16.7             | 63.2                    | 5.9                     | 100.0       |
| 132                                                          | 11.1             | 57.9                    | 5.9                     | 100.0       |
| 133                                                          | 11.1             | 42.1                    | 0.0                     | 100.0       |
| 135                                                          | 11.1             | 36.8                    | 0.0                     | 100.0       |
| 137                                                          | 11.1             | 10.5                    | 0.0                     | 100.0       |
| 139                                                          | 5.6              | 5.3                     | 0.0                     | 100.0       |
