# Supplementary material for: Insertional mutagenesis in the zoonotic pathogen Chlamydia caviae
Source: PLOS journal article supplement (doi:10.1371/journal.pone.0224324), 2019-11-07
Supplement: S1 (10.1371/journal.pone.0224324.s001) [file journal.pone.0224324.s001]

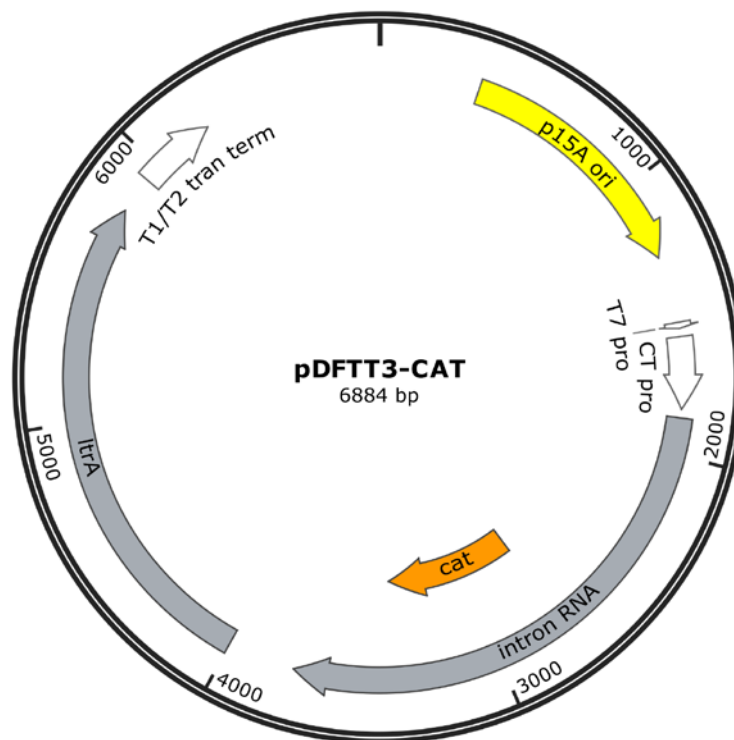

#### Features

|           |                  |
|-----------|------------------|
| 366-1278  | p15A ori         |
| 1522-1543 | T7 promoter      |
| 1574-1836 | CTL0655 promoter |
| 1868-3756 | Intron RNA       |
| 2737-3393 | cat              |
| 4003-5802 | ltrA             |
| 5938-6228 | T1/T2 tran term  |
| 1856-1867 | IBS              |
| 2087-2095 | EBS2             |
| 2144-2151 | EBS1d            |

**S1 Fig: Map of vector pDFTT3-CAT.** The vector map was generated using SnapGene software (GSL Biotech). The vector sequence is displayed in S2 Fig.
